# Supplementary material for: Oral microbiota of periodontal health and disease and their changes after nonsurgical periodontal therapy
Source: PubMed Central journal article supplement (PMC5932080; doi:10.1038/s41396-017-0037-1), 2018-01-16
Supplement: 41396_2017_37_MOESM1_ESM.pdf [file 41396_2017_37_MOESM1_ESM.pdf]

1 **Supplementary Text online**

2 **Materials and Methods**

3 **Calibration of examiners.** Two calibrated examiners (CC & JB) were involved in the examination  
4 and sampling of the study subjects. The assessment of intra- and inter-examiner consistency was  
5 performed by a modification of a protocol described previously (Drucker et al 2012). Briefly, the  
6 examiners measured the periodontal probing depth (PPD) and clinical attachment loss (CAL) at 6  
7 sites on each of two maxillary teeth in 9 subjects who were not involved in the main study. Each  
8 site was measured twice by the same examiner within an interval of 30 to 60 minutes. The results  
9 showed 99.1% and 98.1% intra-examiner agreement of 1 (i.e., difference of 1 mm or less) for PPD  
10 and CAL, respectively. The inter-examiner agreement of 1 was 100% for both PPD and CAL,  
11 excluding the 3 sites with an intra-examiner difference of 2 mm.

12 **Subjects and microbial sampling.** This investigation was approved by the Health Sciences  
13 Institutional Review Board of the University of Southern California (USC) (HS-11-00026). A total  
14 of 238 samples were obtained from 69 adult subjects (age 19 and over) recruited from the Herman  
15 Ostrow School of Dentistry of USC. The exclusion criteria included subjects who had periodontal  
16 treatment or antibiotic therapy during the previous six months, subjects with a medical condition  
17 that may affect their immune status, subjects who required antibiotic premedication prior to  
18 treatment, pregnant or lactating women and subjects who were taking medications (e.g.,  
19 cyclosporine) that may affect the characteristics of the subgingival bacteria. Inclusion criteria  
20 for the diseased group consisted of being an adult patient with CAL and PPD >3 mm in at least  
21 30% of the teeth. The periodontally healthy group consisted of adult patients with no CAL, no  
22 bleeding on probing (BOP), and PPDs  $\leq$ 3mm in all teeth with the exception of the 3<sup>rd</sup> molars

23 For each study subject at baseline, two contralateral maxillary posterior teeth were sampled  
24 with sterile paper points as described previously (Ashimoto et al 1996, Chen et al 1997). After  
25 subgingival sampling, the sample sites were examined by the two designated examiners. The  
26 periodontal diagnosis, following the American Academy of Periodontology disease classification  
27 system (Armitage 2004), was verified by the examiners. The clinical measurements (i.e., PPD,  
28 CAL, BOP) were limited to the sampling sites.

29 An unstimulated whole saliva sample was obtained from each subject. A 50-ml sterile,  
30 disposable centrifuge tube was provided to each subject for saliva collection. During sample  
31 collection, the subjects were instructed to lower their heads and let the saliva run passively to the  
32 front bottom of their mouths and spit into the tubes provided. Each saliva donor provided 3-5 ml  
33 of whole saliva in 2 to 10 minutes. After collection, the saliva samples were immediately  
34 transferred to the laboratory and either processed immediately or kept frozen at -80°C until use.

35 After baseline examination and sampling, the subjects who were diagnosed with chronic  
36 periodontitis received conventional nonsurgical periodontal treatment that included oral hygiene  
37 instruction, scaling and root planing, and subgingival irrigation with 10% povidone iodine. No  
38 antibiotics were prescribed for the subjects. A subset (N=19) of the diseased subjects were  
39 resampled at the appointment for periodontal re-evaluation at least 4 weeks after the completion  
40 of the treatment for the whole mouth.

41 Among 19 subgingival sites, the treatment was considered effective in two sites (major  
42 improvement [MI]: reduction in PPD of 2 mm or more, gain in CAL of 2 mm or more and a shift  
43 from BOP to no BOP), and somewhat effective in 12 sites (slight improvement [SI]: reduction in  
44 PPD by 1 mm and/or gain in CAL by 1 mm and a shift from BOP to no BOP), and ineffective in  
45 5 sites (no improvement [NI]: persistent BOP),

46 **Extraction of DNA.** Subgingival plaque samples collected by sterile paper points were immersed  
47 in PBS and vortexed to dislodge the bacteria. After removing the paper points, the samples were  
48 centrifuged at 20,000 rpm for 5 min to pellet the bacteria. The DNA was then extracted with the  
49 QIAamp DNA Mini Kit (Qiagen Inc.) following the manufacturer's protocol. DNA extraction  
50 from the saliva samples followed the protocol described previously (Quinque et al 2006, Yang et  
51 al 2012). Briefly, 500  $\mu$ l of saliva was mixed with an equal volume of lysis buffer (50 mM Tris,  
52 pH 8.0, 50 mM EDTA, 50 mM sucrose, 100 mM NaCl, 1% SDS). To this mixture, 75  $\mu$ l of 10%  
53 SDS and 15  $\mu$ l of proteinase K (20 mg/ml) were added, and the sample was incubated at 53°C in  
54 a shaking water bath overnight. After addition of 200  $\mu$ l of 5M NaCl, the mixture was incubated  
55 on ice for 10 min and then centrifuged at 13,000 rpm at room temperature. The DNA in the  
56 supernatant was precipitated with the addition of 400  $\mu$ l of isopropanol and pelleted by  
57 centrifugation. The pellet was washed with 70% ethanol, dried in air, and dissolved in water until  
58 use. The amount and the quality of the DNA were determined by OD<sub>260</sub> and OD<sub>280</sub> measurements.

59 **Amplification of 16S rDNA and MiSeq sequencing.** Barcoded forward and reverse primers  
60 targeting 16S rDNA base positions 515-806 that included the V4 region (in reference to  
61 *Escherichia coli*) were used (Baker et al 2003). Each forward primer was comprised of an adapter,  
62 a sequencing primer, a spacer, and a 19-base primer for the 16S rDNA target. Each reverse primer  
63 also included a 12-bp barcode sequence allowing for pooling of up to 2,167 multiple samples in  
64 each lane. The list of primers is provided in Supplementary Table S1.

65 In a typical PCR reaction, the PCR mixture contained 2.5  $\mu$ l of buffer, 1  $\mu$ l each of the  
66 forward and reverse primers, 0.1  $\mu$ l of *AccuTaq*, 2.5~5.0 ng of template DNA, and enough water  
67 to achieve a final volume of 25  $\mu$ l. The PCR profile was as follows: 94°C/1 min; 30 cycles of  
68 94°C/20s, 53°C/25s, 68°C/45s; and a final extension at 68°C for 10 min. After amplification, 2  $\mu$ l

69 of the PCR product was analyzed directly by agarose gel (1%) and another 5  $\mu$ l of the PCR product  
70 was analyzed by Picogreen. Based on the Picogreen result, part of the purified PCR product (about  
71 5  $\mu$ l to 10  $\mu$ l containing 100 ng to 200 ng of DNA) was added to a multi-sample pool. The pooled  
72 PCR products were gel purified (1% agarose gel) and re-quantified with Picogreen, Qubit, and  
73 Bioanalyzer. Then the pooled PCR products were serially diluted to 2 nM for sequencing. PCR  
74 products were then processed for sequencing by the Illumina MiSeq platform according to the  
75 method described previously (Caporaso et al 2010, Caporaso et al 2011, Caporaso et al 2012).

76 **Sequencing data pre-processing.** After assigning each sequence to its sample according to its  
77 tag/barcode and allowing no mismatches, a total of 10,412,986 reads (250 bp) from both ends were  
78 obtained from the samples. Pair-end reads were merged into longer reads by FLASH (Magoc and  
79 Salzberg 2011) followed by the recommended UPARSE pipeline (Edgar 2013). The setting for  
80 maximum expected error was 0.5 and chimeras were checked against the Greengenes 16S core  
81 reference sequences (DeSantis et al 2006). Operational taxonomic units (OTUs) were generated at  
82 a similarity level of 97% and 10,000 sequences from each sample were resampled without  
83 replacement. Taxonomic annotations were assigned to the representative sequence of each OTU  
84 by the Ribosomal Database Project (RDP) naïve Bayesian 16S classifier (Wang et al 2007). The  
85 sequences are accessible at the NCBI Sequence Read Archive (accession: SRP075100).

86 **16S rDNA sequence analysis.** The final 16S data set was analyzed for differential abundance of  
87 OTUs or genera using a variety of tools including STAMP 2.0.8 (Parks and Beiko 2010, Parks et  
88 al 2014), R v3.1.3 ( <http://www.r-project.org/>), vegan (R package), and metagenomeSeq  
89 (R/Bioconductor package) (Paulson et al 2013). For STAMP and R analyses, a metadata file was  
90 constructed describing the experimental metadata for each sample including subject (patient)  
91 number, treatment status (healthy, diseased pre-treatment, diseased post-treatment), subgingival

92 plaque vs. saliva, healthy vs. diseased, recession, PPD, CAL, gender, tobacco use, alcohol use,  
93 age, and whether the samples were paired (i.e., pre- and post-treatment samples from the same  
94 subject and site). These metadata were used to group the samples into subsets and for analysis  
95 using different factors in two-group and multi-group analyses in STAMP, and for subset-grouping  
96 and constructing linear models in metagenomeSeq.

97 STAMP allows for statistical analyses of two samples, two groups (multiple samples in  
98 each group), and multiple groups. The statistical parameters used for these analyses were as  
99 follows and were fully described previously (Parks and Beiko 2010, Parks et al 2014). For multiple  
100 group analysis (multiple groups of samples), the statistical test used was ANOVA with Storey's  
101 false discovery rate (FDR) approach used for multiple test correction of  $p$ -values. The Tukey-  
102 Kramer method was used for the post-hoc test (0.95) and the eta-squared method was used as the  
103 measure of effect size.

104 Abundance profiling of metagenomics data was analyzed using metagenomeSeq to test for  
105 differential abundance between metagenomic samples by fitting normalized abundance profiles to  
106 a zero-inflated Gaussian (ZIG) distribution (Paulson et al 2013). The fit was made using a user-  
107 defined linear model that included covariates of interest such as sample site (saliva, subgingival  
108 plaque) or treatment state (periodontally healthy, periodontally diseased/pre-treatment,  
109 periodontally diseased/post-treatment). Rare features (OTUs consisting of cumulatively <15  
110 occurrences across all samples) were removed and normalization factors were determined for each  
111 trimmed data set using the *cumNorm* function of metagenomeSeq (0.75). The *fitZig* output was  
112 examined both with and without the effective sample size cutoff ( $eff = 0.5$ ) to identify those  
113 samples most likely to be differentially abundant, with  $p$ -values adjusted to account for multiple  
114 corrections using the FDR approach.

115 Pearson correlation coefficients and Bray-Curtis dissimilarity values were calculated in R  
116 for all pairs of samples. A heat map of the log<sub>2</sub> transformed counts of the 200 OTUs with the  
117 largest overall variance was created in metagenomeSeq using the MRheatmap function. The  
118 heatmap was clustered both by OTU (column) and sample (row). Figures were reformatted in  
119 Adobe Illustrator without modification of the underlying data.

120 Principal component analysis (PCA) plots were constructed in STAMP using different  
121 factors defined in the metadata file. Alpha and beta diversity, hierarchical clustering and detrended  
122 correspondence analysis (DCA) were conducted using the Institute for Environmental Genomics  
123 (IEG) pipeline (<http://ieg.ou.edu>) or R. Classical multidimensional scaling (CMDS) plots were  
124 constructed in metagenomeSeq. All other analyses were conducted in R using custom R scripts.

125 **Correlation network construction and analysis.** Microbial interactions in this study were  
126 characterized by pairwise correlations (i.e., Pearson correlation coefficient) among the abundances  
127 at the level of OTU or genus. To construct the correlation network, we first assembled the  
128 correlation matrix for each sample group based on all pairwise taxa abundance correlations. A  
129 threshold value was assigned for each correlation matrix to remove the correlations with strengths  
130 lower than the threshold for the network inference. The threshold identification is a crucial step,  
131 because using inappropriate critical thresholds can cause inaccurate structures of the inferred  
132 network. In this study, we used a Random Matrix Theory (RMT)-based approach for assigning the  
133 critical thresholds. The details of the RMT approach were documented previously (Deng et al  
134 2012, Shi et al 2016). In brief, a system (i.e., correlation matrix) falling within the applicable range  
135 of the RMT obeys two universal laws in which if the system was system-specific and non-random,  
136 its nearest neighbor spacing distribution (NNSD) of matrix eigenvalues follows Poisson statistics;  
137 while if the system was inflated with randomness and noise, its NNSD follows the Wigner-Dyson

138 distribution. When the threshold value is attempted from low to high, weak and random  
139 correlations are removed from the system increasingly, so the NNSD of the system will transition  
140 from following the GOE distributions to following Poisson distributions. Therefore, such a  
141 transition point is mathematically defined and can serve as a reference point to distinguish system-  
142 specific and non-random properties of the system from random noise. Compared with methods  
143 using arbitrary thresholds or relying on empirical p-values, the RMT-based approach has the  
144 advantages of being theoretically sound, identifying the thresholds automatically and objectively,  
145 and having been demonstrated to work compatibly with network inference in biological systems,  
146 such as inferring metabolic (Luo et al 2007 #12103), protein (Luo et al 2007 #12104), and  
147 microbial ecological networks (Zhou, 2011 #12105). The RMT-based approach used in this study  
148 has the following steps for the identification of the threshold.

- 149     **1.** Start from the taxonomic profiling data  $C$ , which is an  $m \times n$  matrix where  $m$  is the number  
150         of samples and  $n$  is the number of OTUs detected, and every quantity  $c_{kj}$  represents the  
151         count the OTU  $j$  in sample  $k$ . Meanwhile, OTUs with presence in less than 60% of the  
152         samples were excluded from further analysis.
- 153     **2.** Calculate the co-occurrence matrix  $P$ , which is an  $n \times n$  symmetric matrix, and every  
154         quantity  $p_{ij}$  from  $P$  is the co-occurrence strength (i.e., Pearson correlation) between the  
155         OTU  $i$  and  $j$ .
- 156     **3.** Generate a threshold series,  $s = [s_0, s_1, \dots, s_k, \dots, s_{max}]$ , where  $s_0 = 0.3$ ,  $s_{max} = 1$  and  
157          $s_k - s_{k-1} = 0.01$ .
- 158     **4.** For each  $s_k$  in every  $s$ , the following algorithm was performed for transitioning point  
159         evaluation.
  - 160             i. Reduce the  $P$  to  $P_{s_k}$  in such a way that any  $p_{ij} \in [-s_k, s_k]$  was set to 0.

- 161           ii.    Calculate eigenvalues  $\lambda$  of the  $P_{s_k}$ , where  $\lambda$  is the eigenvalue, and transform  $\lambda$  to  $e$ ,  
162                    where  $e_i = N_{av}(\lambda_i)$ , and  $N_{av}$  is the unfolding function of eigenvalues.
- 163           iii.    Calculate the nearest neighbor spacings (NNS) of unfolded eigenvalues,  $d$ , where  
164                     $d_i = |e_{i+1} - e_i|$  for every  $i = 1, 2, \dots, n - 1$ .
- 165           iv.    Approximate the probability density of NNSD,  $P(d)$ , which can be treated as a  
166                    standard quantity describing the level fluctuations of the system. Assess the  
167                    goodness of fit of  $P(d)$  for both Poisson and Wigner-Dyson statistics, which are  
168                    expressed as  $P(d) \approx e^{-d}$  and  $P_{GOE}(d) \approx \frac{\pi}{2} \cdot d \cdot e^{(-\pi \cdot d^2/4)}$ , respectively. Terminate  
169                    the process and yield the threshold  $s_k$ , if  $P(d)$  fits the Poisson distribution better  
170                    than the Wigner-Dyson distribution, and  $s_k$  is chosen for the final threshold.

171           With the final threshold  $s_k$ , each correlation matrix was transformed into the corresponding  
172           adjacency matrix by: 1) setting every value in the correlation matrix to 0 if its absolute form was  
173           less than  $s_k$ , and 2) setting the value to 1 if its absolute form was greater than  $s_k$ . To this end,  
174           adjacency matrices were obtained and used for constructing all correlation networks.

175           Each correlation network was visualized and analyzed in Cytoscape 3.4.0. We computed  
176           the following topological indices for the analysis: node number, link/edge number, average  
177           shortest path length, clustering coefficient (Watts and Strogatz 1998), diameter (i.e., the longest  
178           length of all shortest paths), average node degree (i.e., average number of node neighbors), density  
179           (i.e., edge number divided by the number of all possible edges), centralization and heterogeneity  
180           (Dong and Horvath 2007). Putative key nodes/taxa were inferred based on: 1) whether the nodes  
181           had the most degree in the module where they were located, 2) whether the nodes had most of their  
182           edges connected to different modules, and 3) both situations. Accordingly, all taxa were assigned  
183           to one of the following roles in the network: peripherals, connectors, module hubs or network hubs



184 (Deng et al 2012, Olesen et al 2007, Shi et al 2016). Unique or shared taxa in each module between  
185 sample groups were identified using “Difference” or “Intersection” in the “Advanced Network  
186 Merge” interface available from “Tools” in Cytoscape 3.4.0. For the inferred networks at the level  
187 of OTU, the OTU nodes under each genus were also merged together into the single genus nodes  
188 using the “Group” then “Collapse” features provided in the menu in the Cytoscape graphics panel.

189 **Mechanisms underlying community assembly.** Five community assembly processes were  
190 evaluated. These are variable selection, homogeneous selection, dispersal limitation,  
191 homogenizing dispersal and undominated as described previously (Stegen et al 2013a, Stegen et  
192 al 2015, Webb et al 2008). “Selection” is defined as a major niche-based process which shapes  
193 community structure due to fitness differences (e.g., survival, growth, reproduction) among  
194 different organisms, including effects of abiotic conditions (environmental filtering) and biotic  
195 interactions (e.g., competition, facilitation, mutualism, predation, host filtering). “Variable  
196 selection” or “homogeneous selection” are selection processes under heterogeneous or  
197 homogeneous abiotic and biotic environmental conditions, respectively, which drive communities  
198 toward more dissimilarity or similarity, respectively. “Dispersal limitation” means that the  
199 movement to and/or establishment (colonization) of individuals in a new location is restricted,  
200 which leads to communities that are more dissimilar; while “homogenizing dispersal” means a  
201 very high rate of dispersal among communities, which homogenizes the communities to become  
202 very similar. “Undominated” is a turnover not differentiable from either phylogenetic or taxonomic  
203 null patterns, which mainly includes various stochastic processes, e.g., drift. “Drift” means random  
204 changes of community structure due to the stochastic processes of birth, death and offspring  
205 reproduction.

206 The relative roles of community assembly processes were quantified using a framework  
 207 proposed by Stegen *et al* (Stegen et al 2013b, Stegen et al 2015). The influence of selection was  
 208 estimated based on the beta nearest taxon index ( $\beta NTI$ ) between communities. The pairwise  
 209 turnovers between communities were first analyzed for phylogenetic dissimilarity using the beta  
 210 mean nearest taxon distance ( $\beta MNTD$ , Eq. S1).

$$\beta MNTD_{ij} = \frac{1}{2} \left[ \sum_{k=1}^A p_{ik} \min(\delta_{km}) + \sum_{m=1}^B p_{jm} \min(\delta_{km}) \right] \quad \text{Eq. S1}$$

211 where  $\beta MNTD_{ij}$  is  $\beta MNTD$  between community  $i$  and  $j$ ;  $\delta_{km}$  is the phylogenetic distance between  
 212 OTU  $k$  and OTU  $m$ ;  $p_{ik}$  is the relative abundance (proportion) of OTU  $k$  in community  $i$ ;  $p_{jm}$  is  
 213 the relative abundance (proportion) of OTU  $m$  in community  $j$ . Then, we performed null model  
 214 analysis for phylogenetic dissimilarity, where the OTU labels were shuffled across the tips of the  
 215 phylogenetic tree to randomize phylogenetic relationships among OTUs, while the relative  
 216 abundance of each OTU in each community was fixed as observed. This null model algorithm is  
 217 called “taxa shuffle” (Kembel 2009) and was performed for 1000 times to get 1000 sets of null  
 218  $\beta MNTD$  values. Then,  $\beta NTI$  between community  $i$  and  $j$  is calculated as follows (Fine and Kembel  
 219 2011, Stegen et al 2012).

$$\beta NTI_{ij} = \frac{\beta MNTD_{obs[i,j]} - \overline{\beta MNTD_{null[i,j]}}}{sd(\beta MNTD_{null[i,j]})} \quad \text{Eq. S2}$$

220 where  $\beta MNTD_{obs[i,j]}$  is observed  $\beta MNTD$  between community  $i$  and  $j$ ;  $\overline{\beta MNTD_{null[i,j]}}$  and  
 221  $sd(\beta MNTD_{null[i,j]})$  are the mean and standard deviation of the 1000 null  $\beta MNTD$  between  
 222 community  $i$  and  $j$  from the null model. If the community turnover is due to neutral processes, the  
 223 observed  $\beta MNTD$  should not be differentiable from the null  $\beta MNTD$  values. In contrast, if the  
 224 observed  $\beta MNTD$  of a turnover was significantly higher ( $\beta NTI > 2$ ) or lower ( $\beta NTI < -2$ ) than null

225 expectation, the turnover was considered to be governed by “variable selection” or “homogeneous  
 226 selection” (Stegen et al 2015, Webb et al 2008).

227 Then, the turnovers not governed by selection (i.e.,  $-2 < \beta NTI < 2$ ) were analyzed using the  
 228 modified Raup-Crick metric (RC) based on the Bray-Curtis dissimilarity index (BC) (Stegen et al  
 229 2013b) (Stegen et al 2015). The observed BC of each turnover was compared with 1000 null BC  
 230 values from null model analysis. In the null model, the richness of each sample was fixed as  
 231 observed, and the presence of OTUs in each null community was simulated as a random draw of  
 232 OTUs from a regional species pool with probabilities proportional to their observed occurrence  
 233 frequencies (Chase et al 2011). Then, the abundance of the present OTUs in each null community  
 234 was simulated as a random draw of individuals into the present OTUs with probabilities  
 235 proportional to their regional relative abundances (Stegen et al 2013b). After 1000-time  
 236 randomization, an  $\alpha$  value for each turnover was calculated as the percentage of null BC values  
 237 lower than observed BC plus a half of percentage of null BC values equal to observed BC. Then,  
 238 the RC value of each turnover was calculated by subtracting 0.5 from the  $\alpha$  value and multiplying  
 239 by 2 to make the index range from -1 to +1 (Eq. S3 and S4).

$$RC_{ij} = 2(\alpha - 0.5) = 2 \frac{\sum_{t=1}^{N_{null}} \delta_{[i,j,t]}}{N_{null}} - 1 \quad \text{Eq. S3}$$

$$\delta_{[i,j,t]} = \begin{cases} 0 & BC_{null[i,j,t]} > BC_{obs[i,j]} \\ 0.5 & BC_{null[i,j,t]} = BC_{obs[i,j]} \\ 1 & BC_{null[i,j,t]} < BC_{obs[i,j]} \end{cases} \quad \text{Eq. S4}$$

240 where  $RC_{ij}$  is RC value between community  $i$  and  $j$ ;  $N_{null}$  is the randomization times;  $\delta_{[i,j,t]}$  is an  
 241 operator for RC at the  $t^{\text{th}}$  randomization;  $BC_{null[i,j,t]}$  is the null BC dissimilarity between  
 242 community  $i$  and  $j$  at the  $t^{\text{th}}$  randomization;  $BC_{obs[i,j]}$  is the observed BC dissimilarity between  
 243 community  $i$  and  $j$ . If selection has little effect on the turnover, the major cause of the non-random

244 turnover pattern should be abnormal dispersal conditions. Thus, if an observed BC was  
 245 significantly higher ( $RC > 0.95$ ) or lower ( $RC < -0.95$ ) than null expectation when  $|\beta NTI| < 2$ , the  
 246 turnover was considered to be governed by “dispersal limitation” or “homogenizing dispersal”  
 247 (Stegen et al 2013b). The remaining turnover (i.e.,  $|\beta NTI| < 2$  and  $|RC| < 0.95$ ) that was not  
 248 differentiable from null patterns was named “undominated” (Stegen et al 2015) and included other  
 249 stochastic processes (e.g., drift).

250 After the steps described above, each pairwise turnover was assigned a governing process.  
 251 Then, the relative influence of a process was estimated as the percentage of turnovers governed by  
 252 this process (Stegen et al 2013b, Stegen et al 2015), shown in Eq. S5 to S9.

$$P_{VS} = \frac{\sum w_{VS[i,j]}}{n} \times 100\% \quad w_{VS[i,j]} = \begin{cases} 1 & \beta NTI_{ij} > 2 \\ 0 & \text{else} \end{cases} \quad \text{Eq. S5}$$

$$P_{HS} = \frac{\sum w_{HS[i,j]}}{n} \times 100\% \quad w_{HS[i,j]} = \begin{cases} 1 & \beta NTI_{ij} < -2 \\ 0 & \text{else} \end{cases} \quad \text{Eq. S6}$$

$$P_{DL} = \frac{\sum w_{DL[i,j]}}{n} \times 100\% \quad w_{DL[i,j]} = \begin{cases} 1 & |\beta NTI_{ij}| < 2 \ \& \ RC_{ij} > 0.95 \\ 0 & \text{else} \end{cases} \quad \text{Eq. S7}$$

$$P_{HD} = \frac{\sum w_{HD[i,j]}}{n} \times 100\% \quad w_{HD[i,j]} = \begin{cases} 1 & |\beta NTI_{ij}| < 2 \ \& \ RC_{ij} < -0.95 \\ 0 & \text{else} \end{cases} \quad \text{Eq. S8}$$

$$P_{Un} = \frac{\sum w_{Un[i,j]}}{n} \times 100\% \quad w_{Un[i,j]} = \begin{cases} 1 & |\beta NTI_{ij}| < 2 \ \& \ |RC_{ij}| < 0.95 \\ 0 & \text{else} \end{cases} \quad \text{Eq. S9}$$

253 where  $P_{VS}$ ,  $P_{HS}$ ,  $P_{DL}$ ,  $P_{HD}$ , and  $P_{Un}$  are the process ratios to estimate the relative influence of  
 254 “variable selection”, “homogeneous selection”, “dispersal limitation”, “homogenizing dispersal”,  
 255 and “undominated”, respectively;  $w_{VS[i,j]}$ ,  $w_{HS[i,j]}$ ,  $w_{DL[i,j]}$ ,  $w_{HD[i,j]}$ , and  $w_{Un[i,j]}$  are the operators  
 256 of the corresponding processes for the turnover between community  $i$  and  $j$ ;  $n$  is the number of  
 257 pairwise turnovers in a certain comparison within a group or between groups (treatments) of  
 258 communities. The significance of such a percentage was analyzed by a permutation test in which  
 259 null results were calculated by randomizing the sample names for 1000 times.

260 **References**

261 Ashimoto A, Chen C, Bakker I, Slots J (1996). Polymerase chain reaction detection of 8 putative  
262 periodontal pathogens in subgingival plaque of gingivitis and advanced periodontitis lesions.  
263 *Oral Microbiol Immunol* **11**: 266-273.

264

265 Armitage GC (2004). Periodontal diagnoses and classification of periodontal diseases.  
266 *Periodontology 2000* **34**: 9-21.

267

268 Ashimoto A, Chen C, Bakker I, Slots J (1996). Polymerase chain reaction detection of 8 putative  
269 periodontal pathogens in subgingival plaque of gingivitis and advanced periodontitis lesions.  
270 *Oral Microbiol Immunol* **11**: 266-273.

271

272 Baker GC, Smith JJ, Cowan DA (2003). Review and re-analysis of domain-specific 16S primers.  
273 *J Microbiol Methods* **55**: 541-555.

274

275 Caporaso JG, Kuczynski J, Stombaugh J, Bittinger K, Bushman FD, Costello EK *et al* (2010).  
276 QIIME allows analysis of high-throughput community sequencing data. *Nat Methods* **7**: 335-  
277 336.

278

279 Caporaso JG, Lauber CL, Walters WA, Berg-Lyons D, Lozupone CA, Turnbaugh PJ *et al*  
280 (2011). Global patterns of 16S rRNA diversity at a depth of millions of sequences per sample.  
281 *Proc Natl Acad Sci U S A* **108 Suppl 1**: 4516-4522.

282

283 Caporaso JG, Lauber CL, Walters WA, Berg-Lyons D, Huntley J, Fierer N *et al* (2012). Ultra-  
284 high-throughput microbial community analysis on the Illumina HiSeq and MiSeq platforms.  
285 *ISME J* **6**: 1621-1624.

286

287 Chase JM, Kraft NJB, Smith KG, Vellend M, Inouye BD (2011). Using null models to  
288 disentangle variation in community dissimilarity from variation in alpha-diversity. *Ecosphere* **2**.

289

290 Chen C, Ashimoto A, Sangsurasak S, Flynn MJ, Slots J (1997). Oral food consumption and  
291 subgingival microorganisms: Subgingival microbiota of gastrostomy tube-fed children and  
292 healthy controls. *J Periodontol* **68**: 1163-1168.

293

294 Deng Y, Jiang YH, Yang Y, He Z, Luo F, Zhou J (2012). Molecular ecological network  
295 analyses. *BMC Bioinformatics* **13**: 113.

296

297 DeSantis TZ, Hugenholtz P, Larsen N, Rojas M, Brodie EL, Keller K *et al* (2006). Greengenes, a  
298 chimera-checked 16S rRNA gene database and workbench compatible with ARB. *Appl Environ*  
299 *Microbiol* **72**: 5069-5072.

300  
301 Dong J, Horvath S (2007). Understanding network concepts in modules. *BMC systems biology* **1**:  
302 24.

303  
304 Drucker SD, Prieto LE, Kao DW (2012). Periodontal probing calibration in an academic setting.  
305 *Journal of dental education* **76**: 1466-1473.

306  
307 Edgar RC (2013). UPARSE: highly accurate OTU sequences from microbial amplicon reads.  
308 *Nat Methods* **10**: 996-998.

309  
310 Fine PVA, Kembel SW (2011). Phylogenetic community structure and phylogenetic turnover  
311 across space and edaphic gradients in western Amazonian tree communities. *Ecography* **34**: 552-  
312 565.

313  
314 Kembel SW (2009). Disentangling niche and neutral influences on community assembly:  
315 assessing the performance of community phylogenetic structure tests. *Ecology Letters* **12**: 949-  
316 960.

317  
318 Magoc T, Salzberg SL (2011). FLASH: fast length adjustment of short reads to improve genome  
319 assemblies. *Bioinformatics* **27**: 2957-2963.

320  
321 Olesen JM, Bascompte J, Dupont YL, Jordano P (2007). The modularity of pollination networks.  
322 *Proc Natl Acad Sci U S A* **104**: 19891-19896.

323  
324 Parks DH, Beiko RG (2010). Identifying biologically relevant differences between metagenomic  
325 communities. *Bioinformatics* **26**: 715-721.

326  
327 Parks DH, Tyson GW, Hugenholtz P, Beiko RG (2014). STAMP: statistical analysis of  
328 taxonomic and functional profiles. *Bioinformatics* **30**: 3123-3124.

329  
330 Paulson JN, Stine OC, Bravo HC, Pop M (2013). Differential abundance analysis for microbial  
331 marker-gene surveys. *Nat Methods* **10**: 1200-1202.

332  
333 Quinque D, Kittler R, Kayser M, Stoneking M, Nasidze I (2006). Evaluation of saliva as a source  
334 of human DNA for population and association studies. *Anal Biochem* **353**: 272-277.

335  
336 Shi S, Nuccio EE, Shi ZJ, He Z, Zhou J, Firestone MK (2016). The interconnected rhizosphere:  
337 High network complexity dominates rhizosphere assemblages. *Ecol Lett* **19**: 926-936.

338  
339 Stegen JC, Lin X, Konopka AE, Fredrickson JK (2012). Stochastic and deterministic assembly  
340 processes in subsurface microbial communities. *Isme Journal* **6**: 1653–1664.

341  
342 Stegen JC, Lin X, Fredrickson JK, Chen X, Kennedy DW, Murray CJ *et al* (2013a). Quantifying  
343 community assembly processes and identifying features that impose them. *ISME J* **7**: 2069-2079.

344  
345 Stegen JC, Lin X, Fredrickson JK, Chen X, Kennedy DW, Murray CJ *et al* (2013b). Quantifying  
346 community assembly processes and identifying features that impose them. *Isme Journal* **7**: 2069-  
347 2079.

348  
349 Stegen JC, Lin X, Fredrickson JK, Konopka AE (2015). Estimating and mapping ecological  
350 processes influencing microbial community assembly. *Front Microbiol* **6**: 370.

351  
352 Wang Q, Garrity GM, Tiedje JM, Cole JR (2007). Naive Bayesian classifier for rapid assignment  
353 of rRNA sequences into the new bacterial taxonomy. *Appl Environ Microbiol* **73**: 5261-5267.

354  
355 Watts DJ, Strogatz SH (1998). Collective dynamics of 'small-world' networks. *Nature* **393**: 440-  
356 442.

357  
358 Webb CO, Ackerly DD, Kembel SW (2008). Phylocom: software for the analysis of  
359 phylogenetic community structure and trait evolution. *Bioinformatics* **24**: 2098-2100.

360  
361 Yang F, Zeng X, Ning K, Liu KL, Lo CC, Wang W *et al* (2012). Saliva microbiomes distinguish  
362 caries-active from healthy human populations. *ISME J* **6**: 1-10.

363  
364  
365  
366  
367  
368  
369
